# Supplementary material for: Morin Modulates Key Targets and Pathways Associated with Gastric Cancer: Network Pharmacology, Molecular Docking, Molecular Dynamics, ADMET, and In‑Vitro Analysis
Source: Research Square preprint supplement (doi:10.21203/rs.3.rs-7632832/v1), 2025-09-25
Supplement: Supplementary file 1 [file c58eedf37feb85da4d034cb2.docx]

**Morin Modulates Key Targets and Pathways Associated with Gastric Cancer: Network Pharmacology, Molecular Docking, Molecular Dynamics, ADMET, and In‑Vitro Analysis**

Nilesh Naskar1, Sunil Kumar2, Bijo Mathew2, Naseer Maliyakkal3, Shweta Shrivastava4,Uday Kumar R5, Manish Kumar Jeengar1,*

1 Department of Pharmacology, Amrita School of Pharmacy, Amrita Vishwa Vidyapeetham, AIMS Health Sciences Campus, Kochi, 682041, Kerala, India

2 Department of Pharmaceutical Chemistry, Amrita School of Pharmacy, Amrita Vishwa Vidyapeetham, AIMS Health Sciences Campus, Kochi, 682041, Kerala, India

3 Department of Basic Medical Sciences, College of Applied Medical Sciences, Khamis Mushait, King Khalid University, Kingdom of Saudi Arabia

4 School of Pharmacy, School of Health and Allied Sciences, ARKA JAIN University, Gamharia, Seraikela Kharsawan- 832108, Jharkhand- India

5 Department of Pharmacy Practice, Amrita School of Pharmacy, Amrita Vishwa Vidyapeetham, Kochi, Kerala, India

**Supplementary Data**

| **Rank** | **Gene** | **PDB ID** | **Resolution** | **Mutation** | **Specified ligand** |
| --- | --- | --- | --- | --- | --- |
| 1 | PIK3R3 | 5ZUT | 2.82 Å | No | Absent |
| 2 | PIK3CA | 8EXL | 1.99 Å | No | Present |
| 3 | PIK3CB | No PDB ID found | | | |
| 4 | PIK3CD | 6PYR | 2.21 Å | No | Present |
| 5 | PIK3R2 | 7RNU | 1.45 Å | No | Absent |
| 6 | PLCG1 | 7NXE | 2.10 Å | No | Present |
| 7 | JAK2 | 4D1S | 1.66 Å | No | Present |
| 8 | IGF1R | 5FXS | 1.90 Å | No | Present |
| 9 | ZAP70 | 1U59 | 2.30 Å | No | Present |
| 10 | ERBB4 | 3BBT | 2.80 Å | No | Present |

**Table S1** Key characteristics of the selected proteins.

**Table S2** Overlapping targets between morin and gastric cancer.

| FNTA | PLEKHA4 | DUT | GP1BA | THRB | TREM1 | PDE4B | BCAT2 | HSD17B1 |
| --- | --- | --- | --- | --- | --- | --- | --- | --- |
| C1R | MTHFD1 | PDE4D | PYGL | UCK2 | BACE1 | PLA2G10 | PCK1 | CBR1 |
| NOS3 | YARS1 | ARSA | PDE3B | ADH1C | RNASE4 | MAN1B1 | SULT2A1 | CBS |
| NT5M | RNASE3 | PAK6 | NR1H2 | ALDOA | FECH | TGM3 | CD1A | PDE5A |
| NMNAT1 | MAPKAPK2 | ACADM | FABP6 | SRM | ADK | GSTT2 | NR1I2 | HAGH |
| NQO2 | GNPDA1 | TPH1 | THRA | SETD7 | ARL5A | GSTA3 | PITPNA | DPEP1 |
| EEA1 | OTC | OAT | RAB9A | MMP16 | ARF4 | HADH | GSTM2 | ZAP70 |
| PPP1CC | PNMT | GCDH | HCK | ESR1 | MAPK14 | PIM1 | EGFR | GSTP1 |
| PPIA | CDK6 | CDK2 | AURKA | GSR | ESR2 | NQO1 | HSPA8 | SRC |
| MTAP | PDPK1 | DPP4 | MMP8 | SOD2 | PRKACA | FGFR1 | CASP7 | DCK |
| SHBG | CCNA2 | PPARD | MMP3 | MMP13 | ESRRG | PLK1 | KIF11 | CCNT1 |
| ALDH2 | DAPK1 | ISG20 | GSK3B | ADAM17 | PDHB | AKT1 | REG1A | ABO |
| RHEB | LCK | C1S | MIF | RHOA | CASP3 | HDAC8 | FABP4 | ITK |
| EPHB4 | CCL5 | UMPS | CSNK2A1 | NOS2 | ERBB4 | INSR | MET | BIRC7 |
| LYZ | RXRA | IL2 | ARHGAP1 | RAB5A | PARP1 | FHIT | PDK2 | CHIT1 |
| ACE | AKR1C1 | IGF1R | NR1H4 | MMP12 | XIAP | JAK2 | CLK1 | EPHA2 |
| IGF1 | MMP9 | KIT | RAC2 | ABL1 | GALE | PLA2G2A | TK1 | JAK3 |
| PAPSS1 | SULT2B1 | APRT | HPRT1 | TGFB2 | AKT2 | PPARA | GSTA1 | MMP1 |
| HINT1 | VDR | PADI4 | EIF4E | CD209 | FOLH1 | CDC42 | RARA | TRDMT1 |
| HNMT | STAT1 | HMOX1 | CLEC4M | RAF1 | GSTM1 | RND3 | CASP1 | CDK7 |
| RAN | GSTO1 | KAT2B |  |  |  |  |  |  |

4 common elements in “PharmMapper” and “Open targets”

62 common elements in “PharmMapper” and “GeneCard”

117 common elements in “PharmMapper”, “GeneCard” and “Open targets”


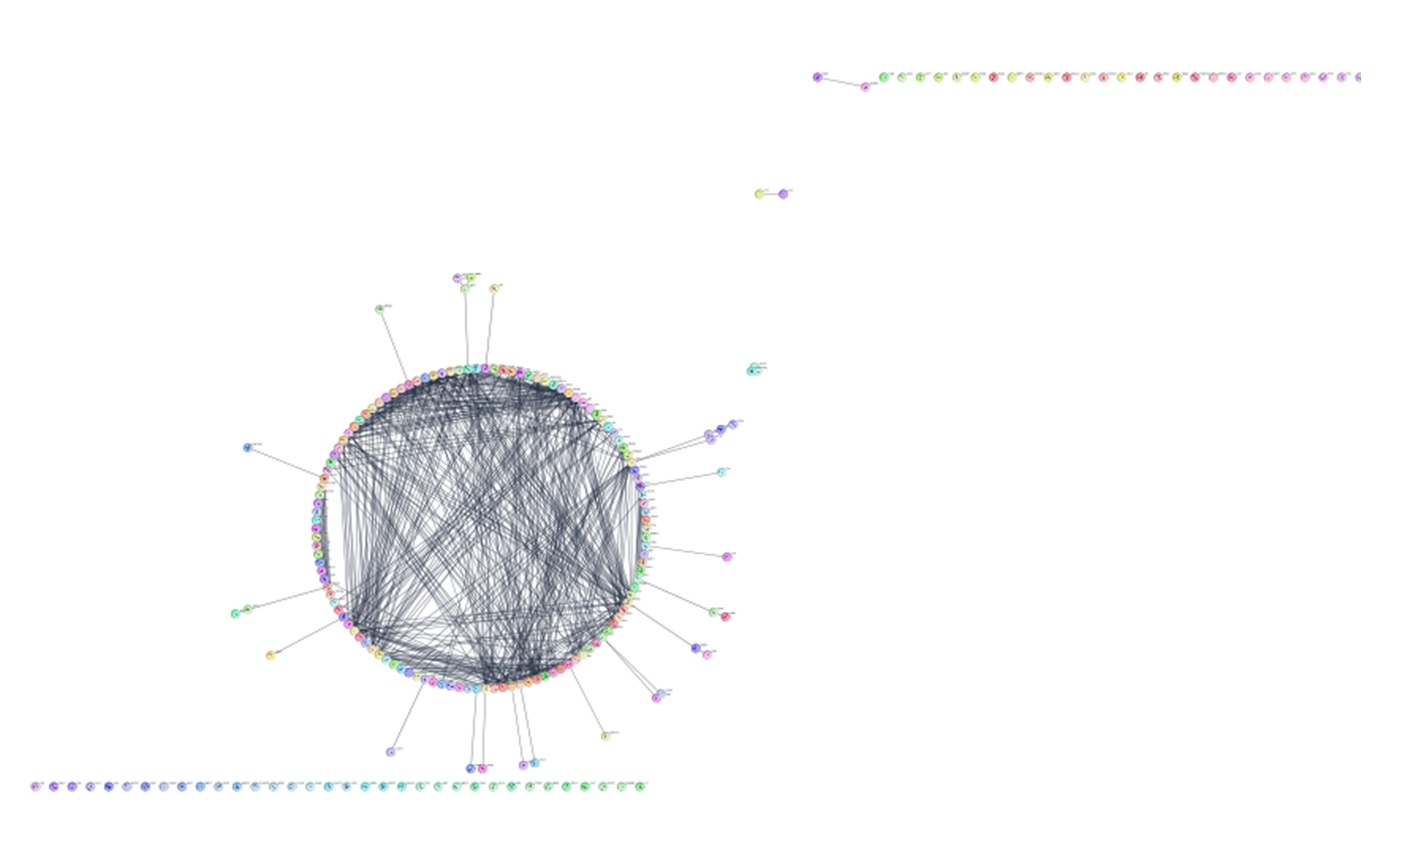


**Fig. S1** STRING network

**Table S3** PPI network modules of shared morin GC targets.

| **Sl. No.** | **Module** | **Targets** | **MCODE Score** | **Nodes** | **Edges** |
| --- | --- | --- | --- | --- | --- |
| 1 | Cluster 1 | PIK3R3, PDPK1, IGF1R, ZAP70, PIK3CA, RAC2, JAK2, PIK3CB, PIK3CD, ERBB4, JAK3, PLCG1, PIK3R2 | 9.333 | 13 | 56 |
| 2 | Cluster 2 | HPRT1, PDE3B, ADK, NT5M, DCK, PDE4B, ENPP1, APRT, PDE4D, ENPP3 | 7.556 | 10 | 34 |
| 3 | Cluster 3 | CBR1, SULT2B1, CYP1A1, CYP2E1, AKR1C1, CYP3A4 | 4.8 | 6 | 12 |
| 4 | Cluster 4 | PLK1, ESR1, NCOR1, AKT1, BRCA1, ABL1, GSK3B, ESR2, MAPK3, AURKA, HSP90AA1, HSPA8, CASP3, CCNA2, STAT3, JUN, NOS3 | 4.75 | 17 | 38 |
| 5 | Cluster 5 | EGFR, AKT2, FGFR1, SHC1, SRC, CDC42, PIK3R1, THRB, ITK, PTPN11, THRA, KIT, RAF1 | 4.54 | 13 | 27 |
| 6 | Cluster 6 | MET, INSR, GRB2, CBL | 3.333 | 4 | 5 |
| 7 | Cluster 7 | CLEC4M, CD209, RHOA | 3 | 3 | 3 |
| 8 | Cluster 8 | MMP3, MMP1, MMP9 | 3 | 3 | 3 |

**
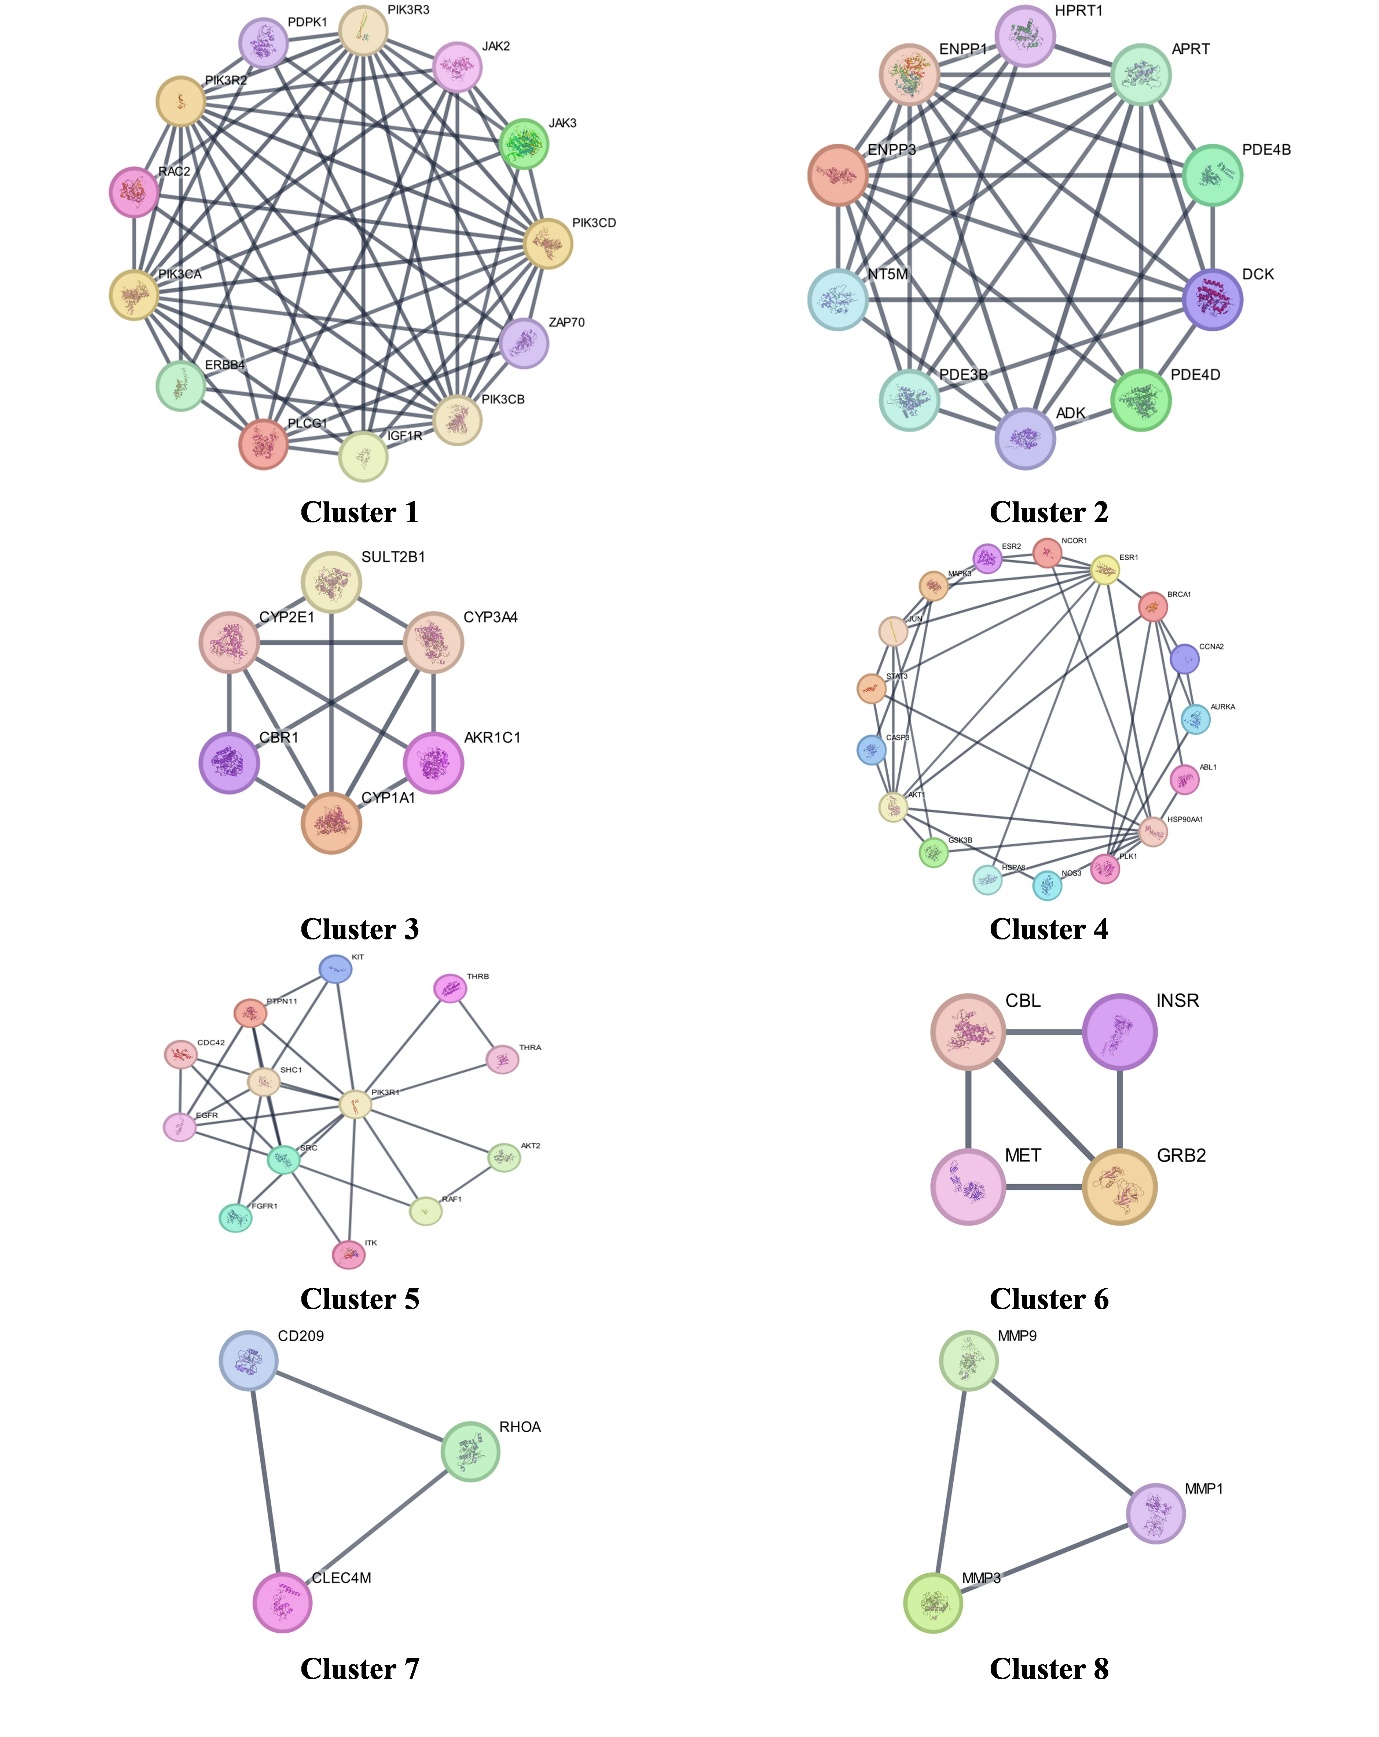
**

**Fig. S2** Clusters generated by MCODE

**Table S4** Top 10 genes ranked by degree method in cluster 1.

| **Rank** | **Shared name** | **Shown name** | **Score** |
| --- | --- | --- | --- |
| 1 | 9606.ENSP00000262741 | PIK3R3 | 12 |
| 1 | 9606.ENSP00000263967 | PIK3CA | 12 |
| 1 | 9606.ENSP00000501150 | PIK3CB | 12 |
| 1 | 9606.ENSP00000366563 | PIK3CD | 12 |
| 1 | 9606.ENSP00000222254 | PIK3R2 | 12 |
| 6 | 9606.ENSP00000244007 | PLCG1 | 9 |
| 7 | 9606.ENSP00000371067 | JAK2 | 8 |
| 8 | 9606.ENSP00000497069 | IGF1R | 7 |
| 9 | 9606.ENSP00000264972 | ZAP70 | 6 |
| 9 | 9606.ENSP00000342235 | ERBB4 | 6 |

**Table S5** Top 10 genes ranked by closeness method in cluster 1.

| **Rank** | **Shared name** | **Shown name** | **Score** |
| --- | --- | --- | --- |
| 1 | 9606.ENSP00000262741 | PIK3R3 | 12 |
| 1 | 9606.ENSP00000263967 | PIK3CA | 12 |
| 1 | 9606.ENSP00000501150 | PIK3CB | 12 |
| 1 | 9606.ENSP00000366563 | PIK3CD | 12 |
| 1 | 9606.ENSP00000222254 | PIK3R2 | 12 |
| 6 | 9606.ENSP00000244007 | PLCG1 | 10.5 |
| 7 | 9606.ENSP00000371067 | JAK2 | 10 |
| 8 | 9606.ENSP00000497069 | IGF1R | 9.5 |
| 9 | 9606.ENSP00000264972 | ZAP70 | 9 |
| 9 | 9606.ENSP00000342235 | ERBB4 | 9 |

**Table S6** Top 10 genes ranked by betweenness method in cluster 1.

| **Rank** | **Shared name** | **Shown name** | **Score** |
| --- | --- | --- | --- |
| 1 | 9606.ENSP00000262741 | PIK3R3 | 8.333333333 |
| 1 | 9606.ENSP00000263967 | PIK3CA | 8.333333333 |
| 1 | 9606.ENSP00000501150 | PIK3CB | 8.333333333 |
| 1 | 9606.ENSP00000366563 | PIK3CD | 8.333333333 |
| 1 | 9606.ENSP00000222254 | PIK3R2 | 8.333333333 |
| 6 | 9606.ENSP00000244007 | PLCG1 | 1.666666667 |
| 7 | 9606.ENSP00000371067 | JAK2 | 0.666666667 |
| 8 | 9606.ENSP00000344220 | PDPK1 | 0 |
| 8 | 9606.ENSP00000497069 | IGF1R | 0 |
| 8 | 9606.ENSP00000264972 | ZAP70 | 0 |


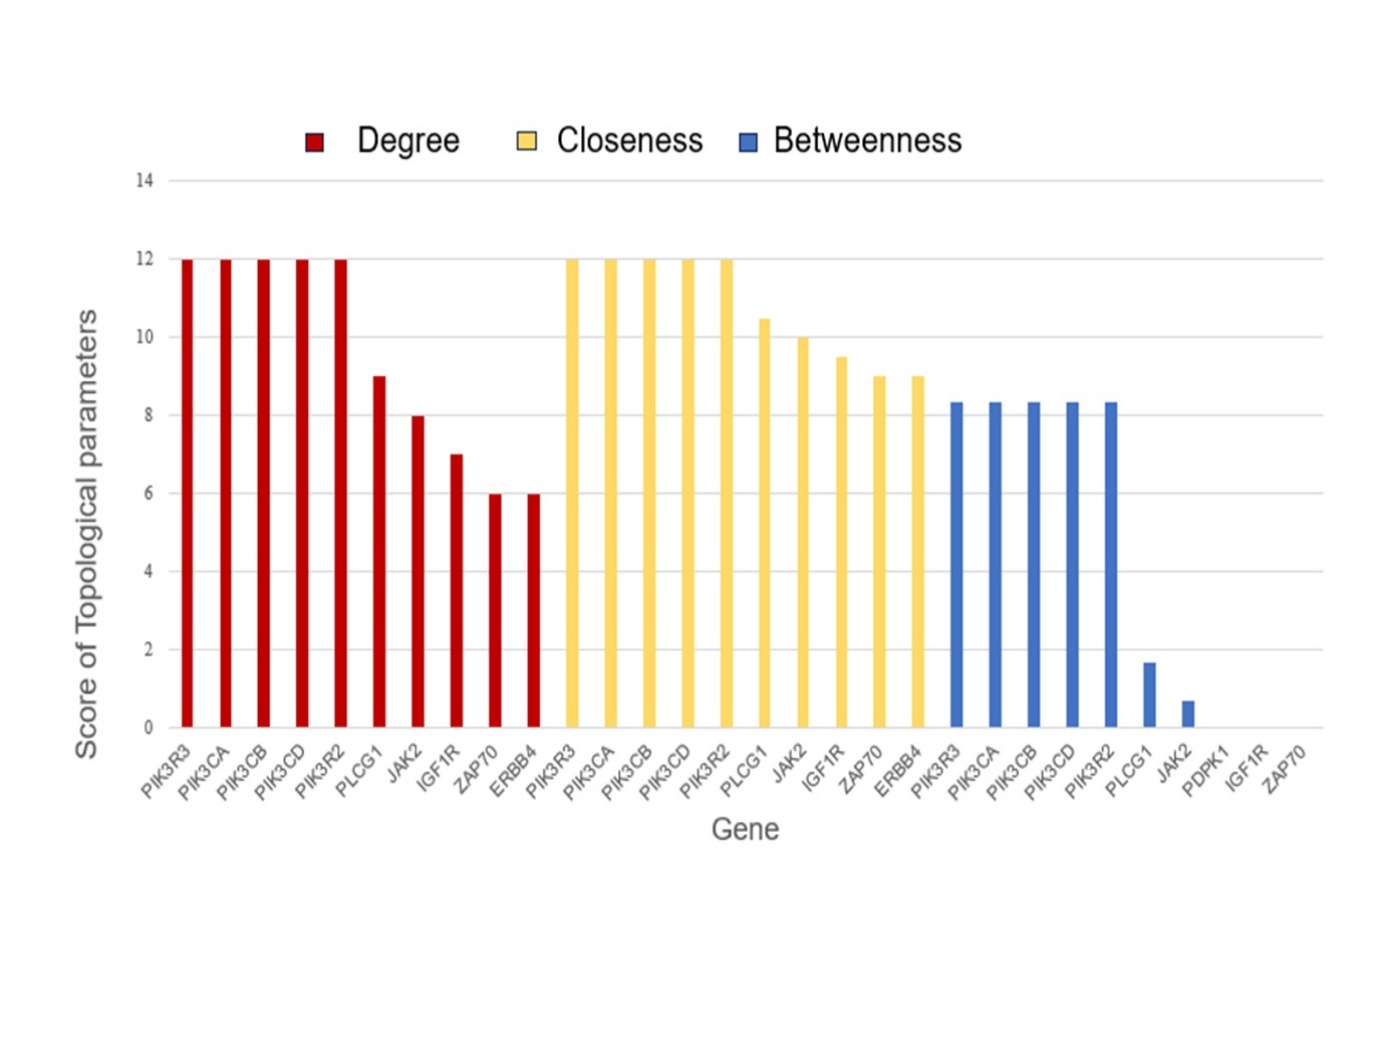


**Fig. S3** Genes and their corresponding topological parameters.


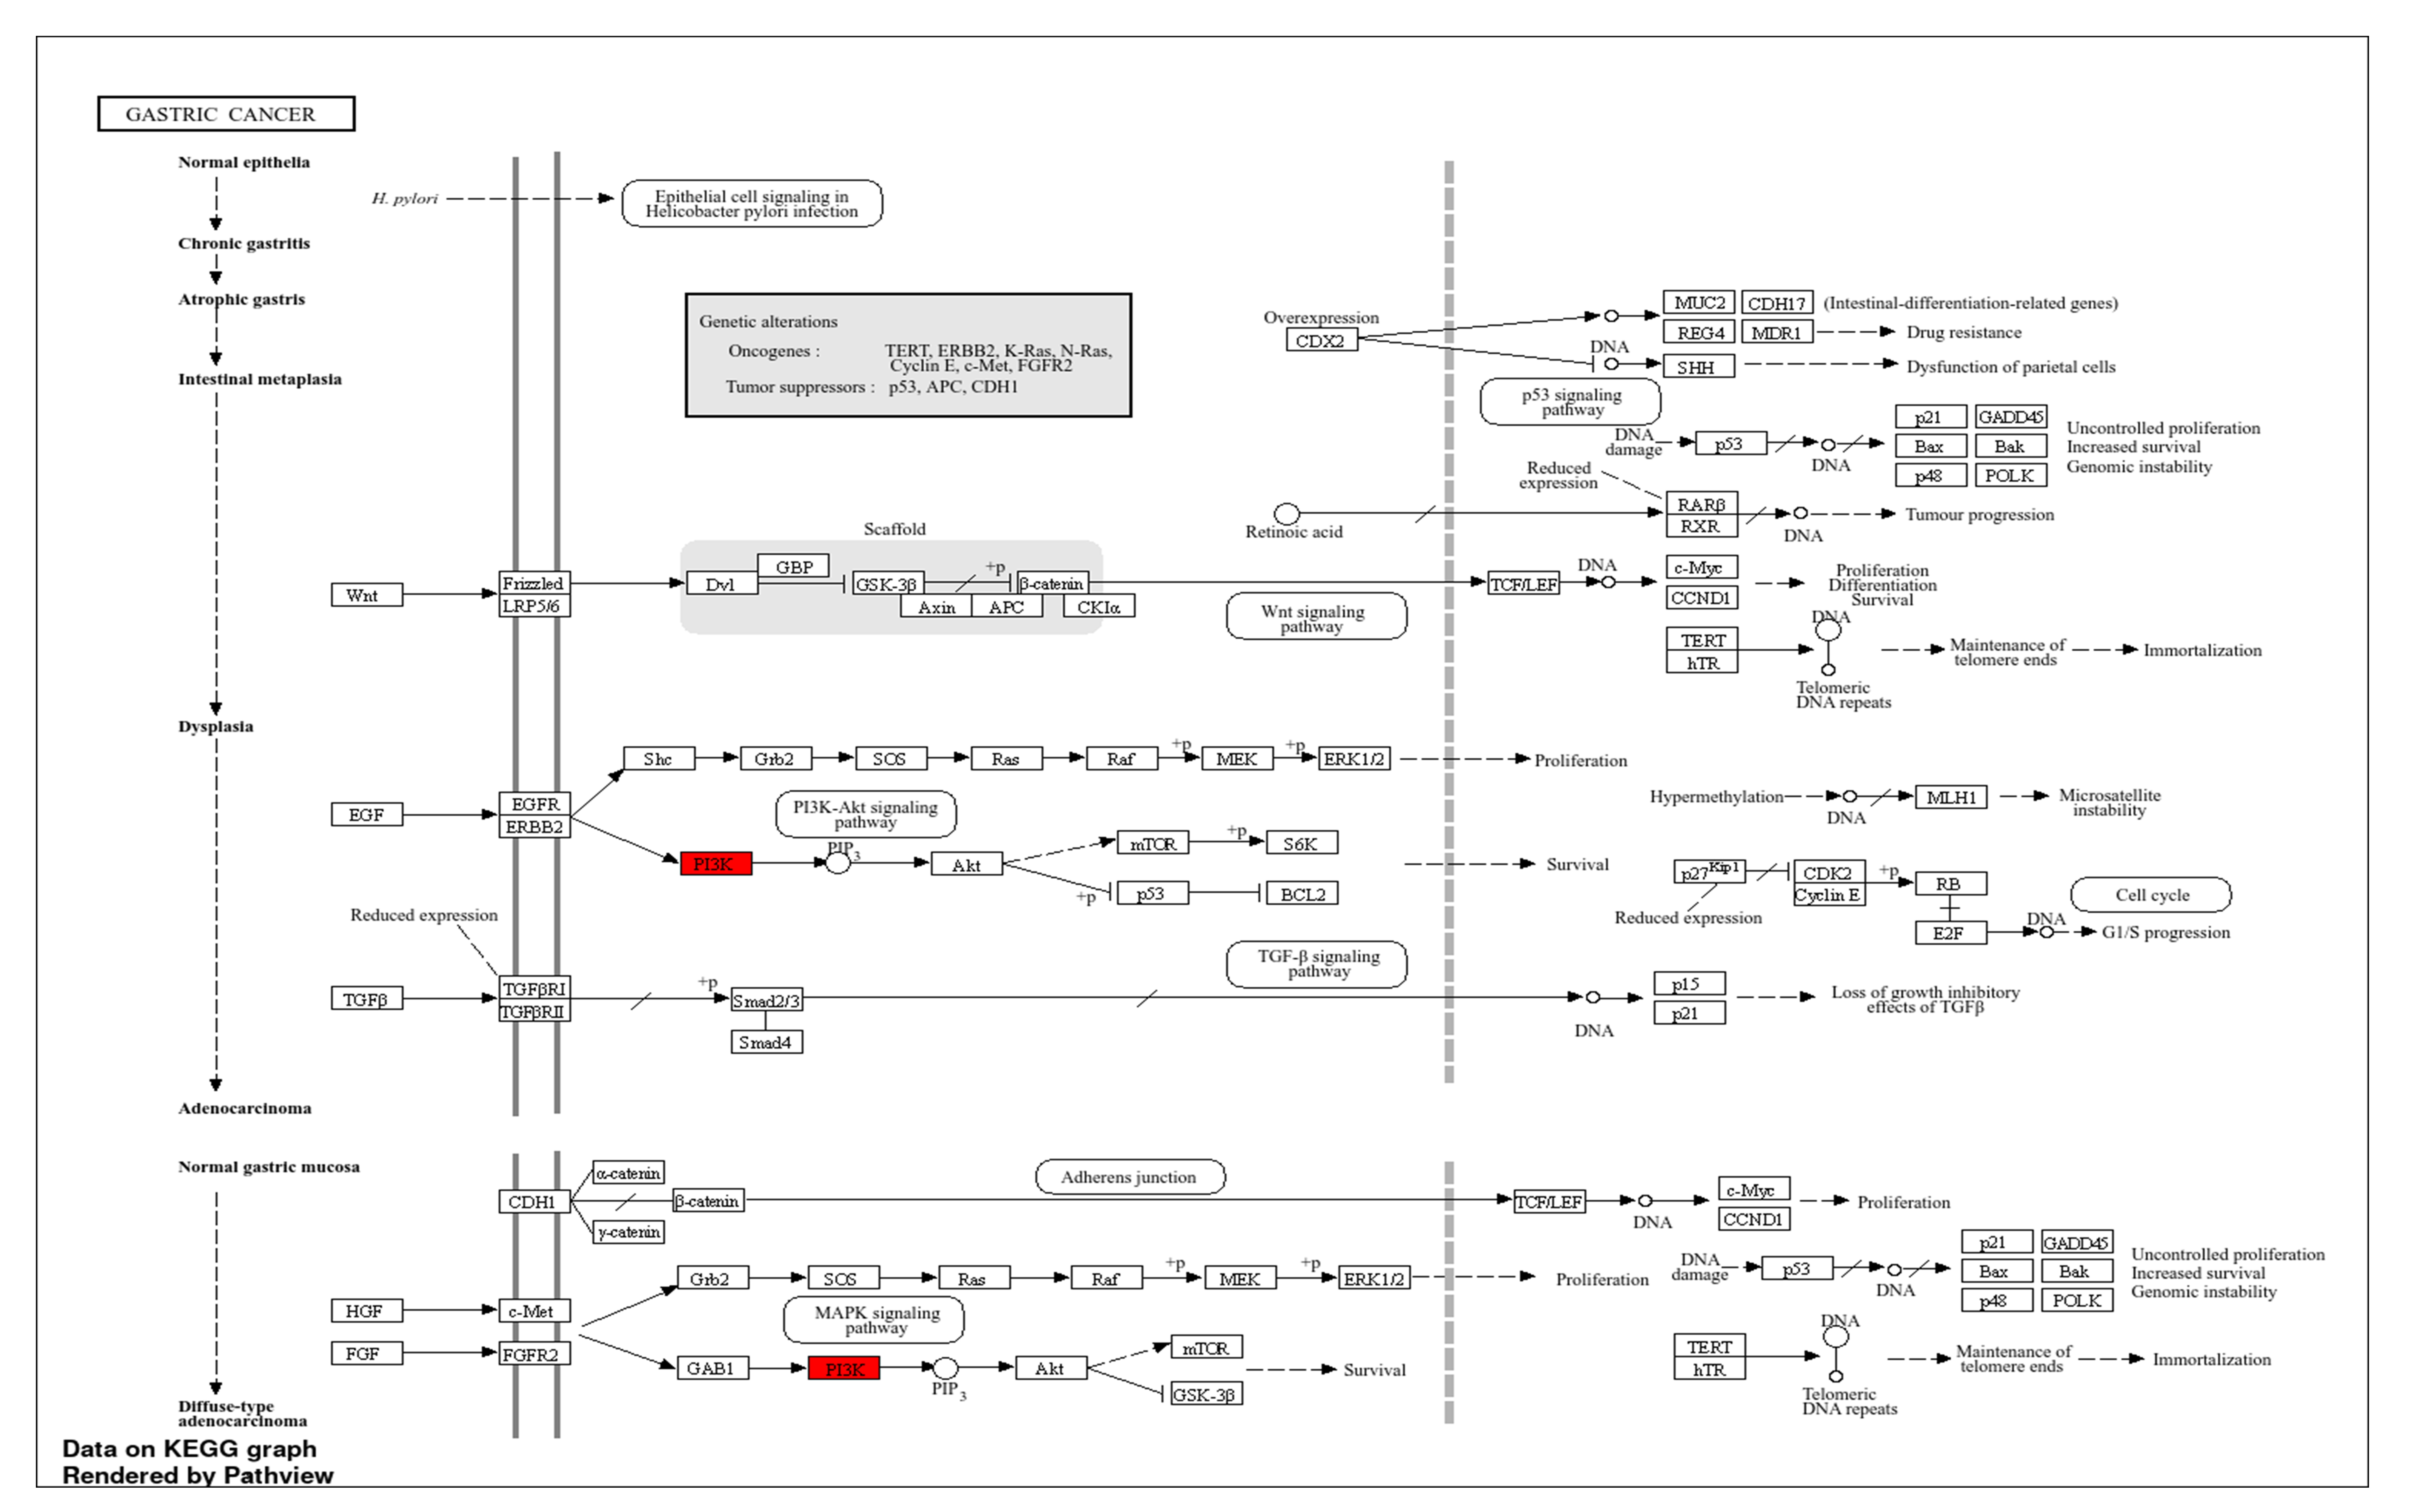


**Fig. S4** Visualization of morin’s interaction points in the GC pathway (KEGG analysis).


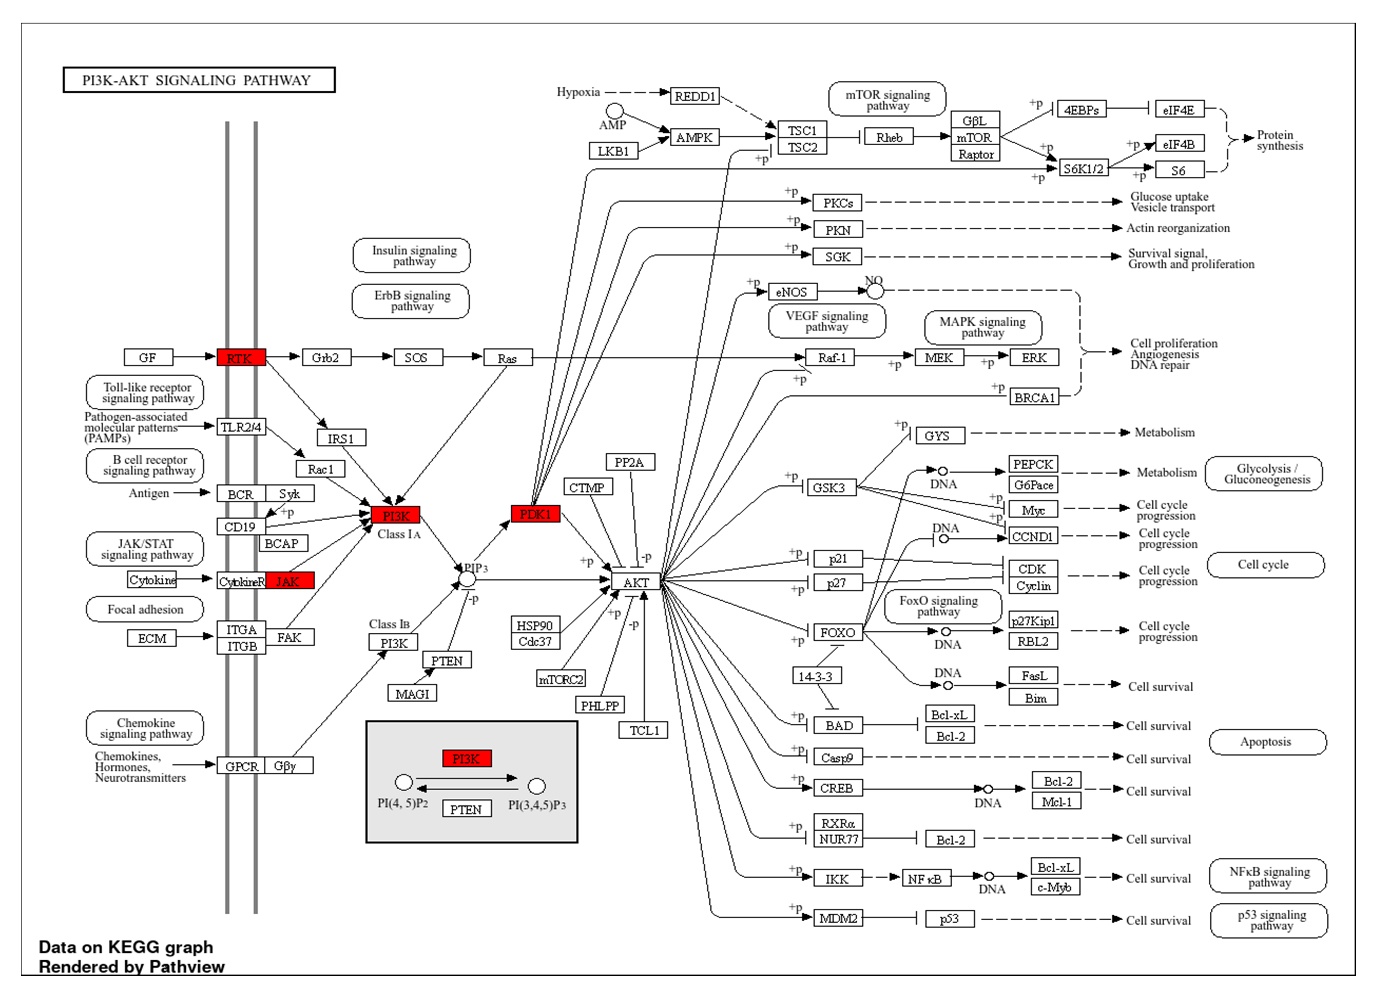
**Fig. S5** Morin’s targets in the PI3K-AKT pathway based on KEGG analysis.
